# Optimizing error correction of RNAseq reads

Matthew D. MacManes<sup>1\*</sup>

<sup>1</sup>Department of Molecular Cellular and Biomedical Sciences, University of New Hampshire, Durham, NH 03824. USA

## ABSTRACT

**Motivation:** The correction of sequencing errors contained in Illumina reads derived from genomic DNA is a common pre-processing step in many *de novo* genome assembly pipelines, and has been shown to improved the quality of resultant assemblies. In contrast, the correction of errors in transcriptome sequence data is much less common, but can potentially yield similar improvements in mapping and assembly quality. This manuscript evaluates several popular read-correction tool's ability to correct sequence errors commonplace to transcriptome derived Illumina reads.

**Results:** I evaluated the efficacy of correction of transcriptome derived sequencing reads using using several metrics across a variety of sequencing depths. This evaluation demonstrates a complex relationship between the quality of the correction, depth of sequencing, and hardware availability which results in variable recommendations depending on the goals of the experiment, tolerance for false positives, and depth of coverage. Overall, read error correction is an important step in read quality control, and should become a standard part of analytical pipelines.

**Availability:** Results are non-deterministically repeatable using AML:ami-3dae4956 (MacManes\_EC.2015) and the Makefile available here: <https://goo.gl/oVluE0>

**Contact:** [matthew.macmanes@unh.edu](mailto:matthew.macmanes@unh.edu) and @PeroMHC

## 1 INTRODUCTION

Genome-enabled biology – the study of biological phenomenon empowered by the use of high throughput sequencing of transcriptomes [MacManes and Eisen, 2014, Ferreira et al., 2013, Balakrishnan et al., 2014], genomes [Castoe et al., 2013, Bactrian Camels Genome Sequencing and Analysis Consortium et al., 2012], and epigenomes [Lyko et al., 2010, Lin et al., 2014] has grown in popularity over the past several years. Much of this growth has been driven by relatively cheap sequencing generated on the Illumina platform. Unlike the previous generation of sequence data (*e.g.*, Sanger) where error rates were far below 1%, the rate of error typical of the Illumina platform is between 1% and 3% [Wang et al., 2012]. This higher error rate is often considered mitigated by high sequencing coverage, which may often result in each nucleotide being sequenced more than 100 times (100x coverage). When depth of coverage  $\gg$  the number or expected sequencing errors, these errors may be efficiently detected by assemblers and

eliminated from the assembly, often early during the creation of the assembly graph [Compeau et al., 2011, Pevzner et al., 2001]. Though shotgun sequencing is expected produce uniform coverage, certain genomic features (*e.g.*, biased GC content) may inhibit the library construction or sequencing process, resulting in coverage valleys. The reconstruction of these regions may be significantly improved by read-error correction.

Concomitant with rapid improvement in quality and quantity of genomic data, and release of genome assemblers has been the development of novel algorithms for the correction of genomic data. These tools (reviewed in [Yang et al., 2013, Molnar and Ilie, 2014]) typically cluster identical and nearly-identical subreads of length  $k$  (*kmers*) then, in a probabilistic framework, attempt to minimize the Hamming (edit) distance of the reads to a consensus *kmer*. These algorithms can be brown down into four general classes (*kmer*-spectra, suffix array, multiple sequence alignment and Hidden Markov Model based methods) [Heo et al., 2014]. These algorithms assume uniform sequence coverage, and therefore have been applied most successfully to genomic data, where the have been shown to improve the quality of genome assembly [Salzberg et al., 2012].

In contrast to DNA sequencing of genomes, RNA sequencing of the expressed parts of the genome (*e.g.*, the transcriptome) offers unique challenges. Chief amongst these challenges include coverage that is variable with patterns of expression and the reconstruction of splice-isoforms, each of which may erode error correction algorithm's ability to accurately distinguish sequencing error from meaningful variation. This complexity may result in higher than expected false-positive rate, or lower than expected rate of error correction. In the face of these challenges, error correction of transcriptome reads has been shown to improve transcriptome assembly [MacManes and Eisen, 2013]. Since it's publication, new correction algorithms have been developed (*e.g.*, BLESS [Heo et al., 2014], and older methods have benefitted from new software implementations. In addition, newer evaluation algorithms had been developed (for example, see evaluation in Li, 2015). Given this, the current work aims to extend on previous work to additional error correction tools and newer analytics, while providing concrete recommendations to researchers interested in selecting an optimal software package for the correction of RNA sequencing reads.

## 2 METHODS

To evaluate the efficacy of read-based error correction of transcriptome data, I used a well characterized [Han et al., 2013] publicly available (SRR797058) Mus RNAseq dataset. Because the efficacy of error correction may vary with depth of sequencing, I randomly subsampled the full dataset to 10, 20, 50, 100 million paired end reads using the `subsampler.py`

\*to whom correspondence should be addressed

MacManes, M.D.

**Table 1.** 10 million paired end reads. *bfc* offers the best overall correction.

|         | RAM   | kmer | perfect         | better          | worse           | gain_perf       |
|---------|-------|------|-----------------|-----------------|-----------------|-----------------|
| raw     |       |      | 7.17E+05        |                 |                 |                 |
| bless   |       |      |                 |                 |                 |                 |
|         | <16Gb | 33   | 9.88E+05        | 1.08E+06        | 8.20E+04        | 1.26E+06        |
|         | <16Gb | 55   | 9.40E+05        | 8.76E+05        | 4.59E+04        | 1.05E+06        |
| lighter |       |      |                 |                 |                 |                 |
|         | <16Gb | 31   | 9.74E+05        | 1.17E+06        | <b>4.27E+04</b> | 1.39E+06        |
| SGA     |       |      |                 |                 |                 |                 |
|         | <16Gb | 33   | 7.65E+05        | <b>3.92E+06</b> | 3.81E+06        | 1.56E+05        |
|         | <16Gb | 55   | 7.73E+05        | 3.90E+06        | 3.82E+06        | 1.43E+05        |
| SEECER  |       |      |                 |                 |                 |                 |
|         | <16Gb | 31   | 1.07E+06        | 1.24E+06        | 5.99E+04        | 1.54E+06        |
| bfc     |       |      |                 |                 |                 |                 |
|         | <16Gb | 33   | <b>1.07E+06</b> | 1.48E+06        | 5.24E+04        | <b>1.78E+06</b> |
|         | <16Gb | 55   | 1.02E+06        | 1.22E+06        | 4.43E+04        | 1.48E+06        |

RAM= the approximate amount of RAM required to complete error correction. len\_kmer is the length of the *kmer*. Perfect is the number of reads that map perfectly (e.g., nm:0). Better is the number of reads whose nm flag is decreased after error correction relative to raw read mapping. Worse is the number of reads whose nm flag is increased after error correction relative to raw read mapping. Gain\_perf is equal to (perfect - better) + better - worse. The error correction software / *kmer* length that maximizes (or minimizes in the case of worse) a given metric is indicated by bold-red type.

script available here (<https://goo.gl/IfI3zm>). The resultant subsets were trimmed with the software package Trimmomatic version 0.32 [Bolger et al., 2014] using recommendations from [MacManes, 2014]. Reads were then subjected to error correction using the following software packages: SEECER version 0.1.3 [Le et al., 2013], Lighter version 1.0.5 [Song et al., 2014], SGA version 0.10.13 [Simpson and Durbin, 2012], bfc version r177 [Li, 2015], and BLESS version 0.24 [Heo et al., 2014]. In correction algorithms (SGA, BLESS, bfc) that allowed for the use of larger *kmer* lengths, I elected to error correct with a small ( $k = 33$ ) and a long ( $k = 55$ ) *kmer*, while for the other software (SEECER and Lighter) that does not allow for longer *kmer* values, I set  $k = 31$ . bfc requires interleaved reads, which was accomplished using khmer version 1.3 [Brown et al., 2014].

After error correction, reads were mapped to chromosome 1 from the *Mus* genome (version GRCh38, available on Ensembl) using default settings of the software package bwa mem version 0.7.12-r1039 [Li, 2013]. The number of nucleotide mismatches between read and reference were calculated via the nm tag from the resultant SAM file. The difference in the number of mismatches between identically mapped reads between raw and error corrected reads was calculated using the `errstat.js` script contained in bfc and K8, contained in bwakit version 0.7.12 (<https://github.com/lh3/bwa/tree/master/bwakit>).

The required software has been installed on an Amazon EC2 machine image (AMI:ami-3dae4956). A makefile for recreating the analysis is located on GitHub (<https://goo.gl/oVluE0>). Note the RAM requirements for determination of the appropriate size of instance.

### 3 RESULTS

Error correction of RNA sequencing resulted in a dramatic improvement in the number of error contains in sequence reads. This effect is highly variable depending on the specific error correction algorithm and *kmer* used as well as the depth of sequencing coverage. When reflecting on the different metrics, it becomes clear they vary with respect to the aggressiveness of correction.

**Table 2.** 20 million paired end reads. *bfc* offers the best overall correction.

|         | RAM   | kmer | perfect         | better          | worse           | gain_perf       |
|---------|-------|------|-----------------|-----------------|-----------------|-----------------|
| raw     |       |      | 1.43E+06        |                 |                 |                 |
| bless   |       |      |                 |                 |                 |                 |
|         | <16Gb | 33   | 2.01E+06        | 2.31E+06        | 1.98E+05        | 2.70E+06        |
|         | <16Gb | 55   | 1.90E+06        | 1.86E+06        | 9.99E+04        | 2.24E+06        |
| lighter |       |      |                 |                 |                 |                 |
|         | <16Gb | 31   | 1.88E+06        | 2.17E+06        | <b>8.31E+04</b> | 2.53E+06        |
| SGA     |       |      |                 |                 |                 |                 |
|         | <16Gb | 33   | 1.49E+06        | <b>7.83E+06</b> | 7.63E+06        | 2.59E+05        |
|         | <16Gb | 55   | 1.54E+06        | 7.81E+06        | 7.63E+06        | 2.87E+05        |
| SEECER  |       |      |                 |                 |                 |                 |
|         | ≈45Gb | 31   | <b>2.15E+06</b> | 2.52E+06        | 1.28E+05        | 3.12E+06        |
| bfc     |       |      |                 |                 |                 |                 |
|         | <16Gb | 33   | 2.11E+06        | 2.86E+06        | 1.03E+05        | <b>3.44E+06</b> |
|         | <16Gb | 55   | 2.03E+06        | 2.44E+06        | 9.00E+04        | 2.96E+06        |

Same description as Table 1

Researchers interested in selecting a tool may choose based on different metrics. For instance, some researchers may choose based on the corrector that makes the fewest mistakes while others may decide on a different optimality criteria. Despite the fact that the correctors are variable in efficacy, several patterns emerge. First, SGA is very aggressive when applied to transcriptome data. It makes, often by an order of magnitude, more reads better. This improvement however, if buffered by the fact that it makes the most reads worse and therefore is generally not an appropriate choice for the correction of transcriptome data. Next, the correction tool Lighter makes, in all of the tests conducted, the fewest number of reads worse (e.g., increases the nm tag value infrequently). For researchers concerned about erroneous correction, this appears to be an optimal choice. Lastly, both correctors bfc and Seecer appear to perform well for a variety of metrics and all tested sequencing depths.

For low coverage transcriptome sequencing, the data presented in Tables 1 and 2 suggest that bfc may optimize error correction; this finding is constant in all of the tests involving lower coverage data. As the amount of sequencing coverage increases past 50 million paired end reads (Tables 3 and 4), the correction tool Seecer becomes more favorable, though this recommendation comes with the cautionary note on RAM usage. Seecer uses in excess of 1Gb of RAM per 1 million paired end reads. This reasonably large RAM requirement may be limiting for some researchers.

### 4 DISCUSSION

Lighter, bfc, SGA and BLESS were all developed for genomic data – that many of them performed quite well was somewhat surprising, given the unique characteristics of transcriptome data. In contrast to these, Seecer was developed specifically for transcriptome sequence data. While it was most efficacious when applied to high coverage data (though with high RAM requirement), it also performed well for lower coverage datasets. bfc was most efficacious at low coverages, and was slightly worse than Seecer at higher coverage.

**Table 3.** 50 million paired end reads. SEECER offers the best overall correction, with bfc close behind.

|         | RAM   | kmer | perfect  | better   | worse    | gain_perf |
|---------|-------|------|----------|----------|----------|-----------|
| raw     |       |      | 3.58E+06 |          |          |           |
| bless   |       |      |          |          |          |           |
|         | <16Gb | 33   | 5.15E+06 | 6.00E+06 | 6.30E+05 | 6.94E+06  |
|         | <16Gb | 55   | 4.89E+06 | 4.99E+06 | 3.12E+05 | 5.98E+06  |
| lighter |       |      |          |          |          |           |
|         | <16Gb | 31   | 4.64E+06 | 5.21E+06 | 2.03E+05 | 6.06E+06  |
| SGA     |       |      |          |          |          |           |
|         | <16Gb | 33   | 3.62E+06 | 1.95E+07 | 1.91E+07 | 4.96E+05  |
|         | <16Gb | 55   | 3.74E+06 | 1.95E+07 | 1.91E+07 | 5.70E+05  |
| SEECER  |       |      |          |          |          |           |
|         | ≈69Gb | 31   | 5.43E+06 | 6.44E+06 | 3.37E+05 | 7.95E+06  |
| bfc     |       |      |          |          |          |           |
|         | <16Gb | 33   | 5.12E+06 | 6.63E+06 | 2.43E+05 | 7.93E+06  |
|         | <16Gb | 55   | 5.02E+06 | 5.96E+06 | 2.21E+05 | 7.18E+06  |

Same description as Table 1

**Table 4.** 100 million paired end reads. SEECER offers the best overall correction.

|         | RAM    | kmer | perfect  | better   | worse    | gain_perf |
|---------|--------|------|----------|----------|----------|-----------|
| raw     |        |      | 7.15E+06 |          |          |           |
| bless   |        |      |          |          |          |           |
|         | <16Gb  | 33   | 1.04E+07 | 1.20E+07 | 1.66E+06 | 1.36E+07  |
|         | <16Gb  | 55   | 9.92E+06 | 1.03E+07 | 7.71E+05 | 1.23E+07  |
| lighter |        |      |          |          |          |           |
|         | <16Gb  | 31   | 9.35E+06 | 1.06E+07 | 4.03E+05 | 1.24E+07  |
| SGA     |        |      |          |          |          |           |
|         | <16Gb  | 33   | 7.08E+06 | 3.90E+07 | 3.82E+07 | 7.25E+05  |
|         | <16Gb  | 55   | 7.17E+06 | 3.89E+07 | 3.82E+07 | 7.25E+05  |
| SEECER  |        |      |          |          |          |           |
|         | ≈126Gb | 31   | 1.09E+07 | 1.31E+07 | 6.78E+05 | 1.61E+07  |
| bfc     |        |      |          |          |          |           |
|         | <16Gb  | 33   | 9.88E+06 | 1.22E+07 | 4.61E+05 | 1.45E+07  |
|         | <16Gb  | 55   | 9.81E+06 | 1.15E+07 | 4.33E+05 | 1.37E+07  |

Same description as Table 1

## 5 CONCLUSION

In conclusion, I offer the following recommendations for researchers interested in selecting an optimal tool for error correction.

1. For sequencing experiments where less than 50 million paired end reads are collected, the software bfc appears to offer an optimal solution, with SEECER running a close second.
2. For sequencing experiments where more than 50 million paired end reads are collected, the software SeecER is best, though at the cost of high RAM requirement. Bfc runs a close second.
3. In higher coverage data where a large amount of RAM is not available, bfc should be chosen.

4. If the research is sensitive to erroneous correction, even in the face of overall poorer performance, the Lighter package should be optimal.

## ACKNOWLEDGEMENT

**Funding:** This work was supported by start up funds provided by the College of Life Science and Agriculture at the University of New Hampshire.

## REFERENCES

- Bactrian Camels Genome Sequencing and Analysis Consortium, Jirimutu, Zhen Wang, Guohui Ding, Gangliang Chen, Yamin Sun, Zhihong Sun, Heping Zhang, Lei Wang, Surong Hasi, Yan Zhang, Jianmei Li, Yixiang Shi, Ze Xu, Chuan He, Siriguleng Yu, Shengdi Li, Wenbin Zhang, Mijiddorj Batmunkh, Batsukh Ts, Narenbatu, Unierhu, Shirzana Bat-Ireedui, Hongwei Gao, Banzragch Baysgalan, Qing Li, Zhiling Jia, Turigenbayila, Subudenggerile, Narenmanduhu, Zhaoxia Wang, Juan Wang, Lei Pan, Yongcan Chen, Yaichil Ganerdene, Dabxilt, Erdemt, Altansha, Altansukh, Tuya Liu, Minhui Cao, Aruuntsever, Bayart, Hosblig, Fei He, A Zhai, Guangyong Zheng, Feng Qiu, Zikui Sun, Lele Zhao, Wenjing Zhao, Baohong Liu, Chao Li, Yunqin Chen, Xiaoyan Tang, Chunyan Guo, Wei Liu, Liang Ming, Temuulen, Aiyang Cui, Yi Li, Junhui Gao, Jing Li, Wurentaodi, Shen Niu, Tao Sun, Zhengxiao Zhai, Min Zhang, Chen Chen, Tunteg Baldan, Tuman Bayaer, Yixue Li, and He Meng. Genome sequences of wild and domestic bactrian camels. *Nature communications*, 3:1202, 2012.
- Christopher N Balakrishnan, Motoko Mukai, Rusty A Gonser, John C Wingfield, Sarah E London, Elaina M Tuttle, and David F Clayton. Brain transcriptome sequencing and assembly of three songbird model systems for the study of social behavior. *PeerJ*, 2(34):e396–17, 2014.
- Anthony M Bolger, Marc Lohse, and Bjoern Usadel. Trimmomatic: a flexible trimmer for Illumina sequence data. *Bioinformatics*, 30(15):2114–2120, August 2014.
- C Titus Brown, Michael R Crusoe, Greg Edverson, Jordan Fish, Adina Howe, Eric McDonald, Joshua Nahum, Kaben Nanlohy, Humberto Ortiz-Zuazaga, Jason Pell, Jared Simpson, Camille Scott, Ramakrishnan Rajaram Srinivasan, and Qingpeng Zhang. The khmer software package: enabling efficient sequence analysis. *Figshare*, pages 1–3, April 2014.
- Todd A Castoe, A P Jason de Koning, Kathryn T Hall, Daren C Card, Drew R Schield, Matthew K Fujita, Robert P Ruggiero, Jack F Degner, Juan M Daza, Wanjun Gu, Jacobo Reyes-Velasco, Kyle J Shaney, Jill M Castoe, Samuel E Fox, Alex W Poole, Daniel Polanco, Jason Dobry, Michael W Vandewege, Qing Li, Ryan K Schott, Aurélie Kapusta, Patrick Minx, Cédric Feschotte, Peter Uetz, David A Ray, Federico G Hoffmann, Robert Bogden, Eric N Smith, Belinda S W Chang, Freek J Vonk, Nicholas R Casewell, Christiaan V Henkel, Michael K Richardson, Stephen P Mackessy, Anne M Bronikowski, Mark Yandell, Wesley C Warren, Stephen M Secor, and David D Pollock. The Burmese python genome reveals the molecular basis for extreme adaptation in snakes. *PNAS*, 110(51):20645–20650, December 2013.
- PEC Compeau, P A Pevzner, and G Tesler. How to apply *de Bruijn* graphs to genome assembly. *Nature Biotechnology*, 2011.
- Pedro G Ferreira, Solenn Patalano, Ritika Chauhan, Richard Ffrench-Constant, Toni Gabaldon, Roderic Guigo, and Seirian Sumner. Transcriptome analyses of primitively eusocial wasps reveal novel insights into the evolution of sociality and the origin of alternative phenotypes. *Genome Biology*, 14(2):R20, 2013.
- Hong Han, Manuel Irimia, P Joel Ross, Hoon-Ki Sung, Babak Alipanahi, Laurent David, Azadeh Golipour, Mathieu Gabut, Iacovos P Michael, Emil N Nachman, Eric Wang, Dan Trecka, Tadeo Thompson, Dave O’Hanlon, Valentina Slobodeniuc, Nuno L Barbosa-Morais, Christopher B Burge, Jason Moffat, Brendan J Frey, andras Nagy, James Ellis, Jeffrey L Wra, and Benjamin J Blencowe. MBNL proteins repress ES-cell-specific alternative splicing and reprogramming. *Nature*, 498(7453): 241–245, June 2013.
- Yun Heo, Xiao-Long Wu, Deming Chen, Jian Ma, and Wen-Mei Hwu. BLESS: Bloom filter-based error correction solution for high-throughput sequencing reads. *Bioinformatics*, 30(10):1354–1362, May 2014.
- Hai-Son Le, Marcel H Schulz, Brenna M McCauley, Veronica F Hinman, and Ziv Bar-Joseph. Probabilistic error correction for RNA sequencing. *Nucleic Acids Research*, 41(10):e109–e109, May 2013.
- H Li. Aligning sequence reads, clone sequences and assembly contigs with BWA-MEM. *arXiv.org*, 2013.

**MacManes, M.D.**

---

- Heng Li. Correcting Illumina sequencing errors for human data. *arXiv.org*, February 2015.
- Shin Lin, Yiing Lin, Joseph R Nery, Mark A Urich, Alessandra Breschi, Carrie A Davis, Alexander Dobin, Christopher Zaleski, Michael A Beer, William C Chapman, Thomas R Gingeras, Joseph R Ecker, and Michael P Snyder. Comparison of the transcriptional landscapes between human and mouse tissues. *PNAS*, 111(48): 17224–17229, December 2014.
- Frank Lyko, Sylvain Foret, Robert Kucharski, Stephan Wolf, Cassandra Falckenhayn, and Ryszard Maleszka. The Honey Bee Epigenomes: Differential Methylation of Brain DNA in Queens and Workers. *PLOS Biology*, 8(11):e1000506, November 2010.
- M D MacManes. On the optimal trimming of high-throughput mRNA sequence data. *Frontiers in Genetics*, 5, 2014.
- Matthew D MacManes and Michael B Eisen. Characterization of the transcriptome, nucleotide sequence polymorphism, and natural selection in the desert adapted mouse *Peromyscus eremicus*. *PeerJ*, 2(3):e642, 2014.
- Matthew David MacManes and Michael B Eisen. Improving transcriptome assembly through error correction of high-throughput sequence reads. *PeerJ*, 1:e113, 2013.
- Michael Molnar and Lucian Ilie. Correcting Illumina data. *Briefings In Bioinformatics*, page bbu029, September 2014.
- P A Pevzner, H Tang, and M S Waterman. An Eulerian path approach to DNA fragment assembly. *Proceedings of The National Academy of Sciences of The United States of America*, 98(17):9748–9753, August 2001.
- S L Salzberg, S L Salzberg, A M Phillippy, A Zimin, A Zimin, D Puiu, D Puiu, T Magoc, T Magoc, S Koren, T J Treangen, T J Treangen, M C Schatz, A L Delcher, A L Delcher, M Roberts, M Roberts, G Marcais, G Marcais, M Pop, J A Yorke, and J A Yorke. GAGE: A critical evaluation of genome assemblies and assembly algorithms. *Genome Research*, 22(3):557–567, March 2012.
- Jared T Simpson and Richard Durbin. Efficient *de novo* assembly of large genomes using compressed data structures. *Genome Research*, 22(3):549–556, March 2012.
- Li Song, Liliana Florea, and Ben Langmead. Lighter: fast and memory-efficient sequencing error correction without counting. *Genome Biology*, 15(11):509, 2014.
- Xin Victoria Wang, Xin Victoria Wang, Natalie Blades, Natalie Blades, Jie Ding, Jie Ding, Razvan Sultana, Razvan Sultana, Giovanni Parmigiani, and Giovanni Parmigiani. Estimation of sequencing error rates in short reads. *BMC Bioinformatics*, 13(1):185, 2012.
- Xiao Yang, Sriram P Chockalingam, and Srinivas Aluru. A survey of error-correction methods for next-generation sequencing. *Briefings In Bioinformatics*, 14(1):56–66, January 2013.
